# Supplementary material for: Comparison of the Fitting Performance of Retention Models and Elution Strength Behaviour in Hydrophilic-Interaction and Reversed-Phase Liquid Chromatography
Source: MDPI journal article supplement (doi:10.3390/separations8040054), 2021-04-20
Supplement: s1 [file s1]

# Comparison of the Fitting Performance of Retention Models and Elution Strength Behaviour in Hydrophilic-Interaction and Reversed-Phase Liquid Chromatography

Ester Peris-García, María José Ruiz-Angel \*, Juan José Baeza-Baeza, and María Celia García-Alvarez-Coque

Departament de Química Analítica, Universitat de València, c/Dr. Moliner 50, 46100 Burjassot, Valencia, Spain; ester.peris@uv.es (E.P.-G.); juan.baeza@uv.es (J.J.B.-B.); celia.garcia@uv.es (M.C.G.-A.-C.)

\* Correspondence: Maria.J.Ruiz@uv.es

**Table S1.** Acidity constants ( $pK_a$ ) and octanol-water partition coefficients ( $\log P_{o/w}$ ), for the probe compounds.

| Compound  | Structure                                                                           | $pK_a$                  | $\log P_{o/w}$   |
|-----------|-------------------------------------------------------------------------------------|-------------------------|------------------|
| Adenosine | 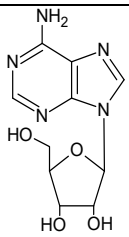  | 3.7 <sup>a</sup>        | $-1.0 \pm 0.5^b$ |
| Cytidine  |  | 4.22; 12.5 <sup>a</sup> | $-1.9 \pm 0.4^b$ |
| Guanosine |  | 2.1; 9.2 <sup>a</sup>   | $-1.7 \pm 0.6^b$ |
| Thymidine |  | 9.72 <sup>a</sup>       | $-1.1 \pm 0.5^b$ |
| Uracil    |  | 9.5 <sup>a</sup>        | $-0.7 \pm 0.3^b$ |

|                        |                                                                                     |                             |                   |
|------------------------|-------------------------------------------------------------------------------------|-----------------------------|-------------------|
| Uridine                | 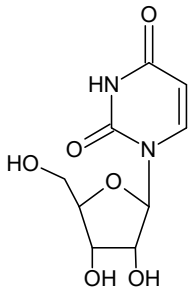   | 8.5 <sup>a</sup>            | $-1.6 \pm 0.4^b$  |
| Xanthosine             |    | 5.5; 12.85 <sup>a</sup>     | $-2.1 \pm 0.6^b$  |
| Sulphachloropyridazine |    | 1.9, 5.1 <sup>c</sup>       | 0.71 <sup>c</sup> |
| Sulphamerazine         |   | 2.2, 7.0 <sup>c</sup>       | 0.11 <sup>c</sup> |
| Sulphaquinoxaline      |  | 5.5 <sup>c</sup>            | 1.45 <sup>c</sup> |
| Sulphisoxazole         |  | 1.8, 5.0 <sup>d</sup>       | 0.81 <sup>c</sup> |
| Althiazide             |  | –                           | 1.17 <sup>f</sup> |
| Ethacrynic acid        |  | 3.5 <sup>e</sup>            | 2.20 <sup>f</sup> |
| Furosemide             |  | 7.5, 3.8 <sup>e</sup>       | 1.81 <sup>f</sup> |
| Trichloromethiazide    |  | 10.6, 8.6, 7.3 <sup>e</sup> | 1.00 <sup>f</sup> |
| Xipamide               |  | 10.0, 4.8 <sup>e</sup>      | 2.19 <sup>f</sup> |

<sup>a</sup> From Padivitage, N.L.; Dissanayake, M.K.; Armstrong, D.W. Separation of nucleotides by hydrophilic interaction chromatography using the FRULIC-N column, *Anal. Bioanal. Chem.* **2013**, *405*, 8837–8848. <sup>b</sup> Calculated with ChemSketch, ACD Labs, 2012 version, <sup>c</sup> From Carda-Broch, S.; Berthod, A. Countercurrent chromatography for the measurement of the hydrophobicity of sulfonamide amphoteric compounds, *Chromatographia* **2004**, *59*, 79–87. <sup>d</sup> From Białk-Bielinska, A.; Stolte, S.; Matzke, M.; Fabianska, A.; Maszkowska, J.; Kołodziejewska, M.; Liberek, B.; Stepnowski, P.; Kumirska, J. Hydrolysis of sulphonamides in aqueous solutions, *J. Hazard Mater.* **2012**, *221–222*, 264–274. <sup>e</sup> From Hansch, C. In *Comprehensive Medicinal Chemistry*, Sammes, R.G.; Taylor, J.B., Eds. Pergamon Press: Oxford, 1990, vol. 6, and Ventura, R.; Segura, J. Detection of diuretic agents in doping control, *J. Chromatogr. B* **1996**, *687*, 127–144. <sup>f</sup> From Berthod, A.; Carda-Broch, S.; García-Alvarez-Coque, M.C. Hydrophobicity of ionizable compounds: a theoretical study and measurements of diuretic octanol-water partition coefficients by countercurrent chromatography, *Anal. Chem.* **1999**, *71*, 879–888.

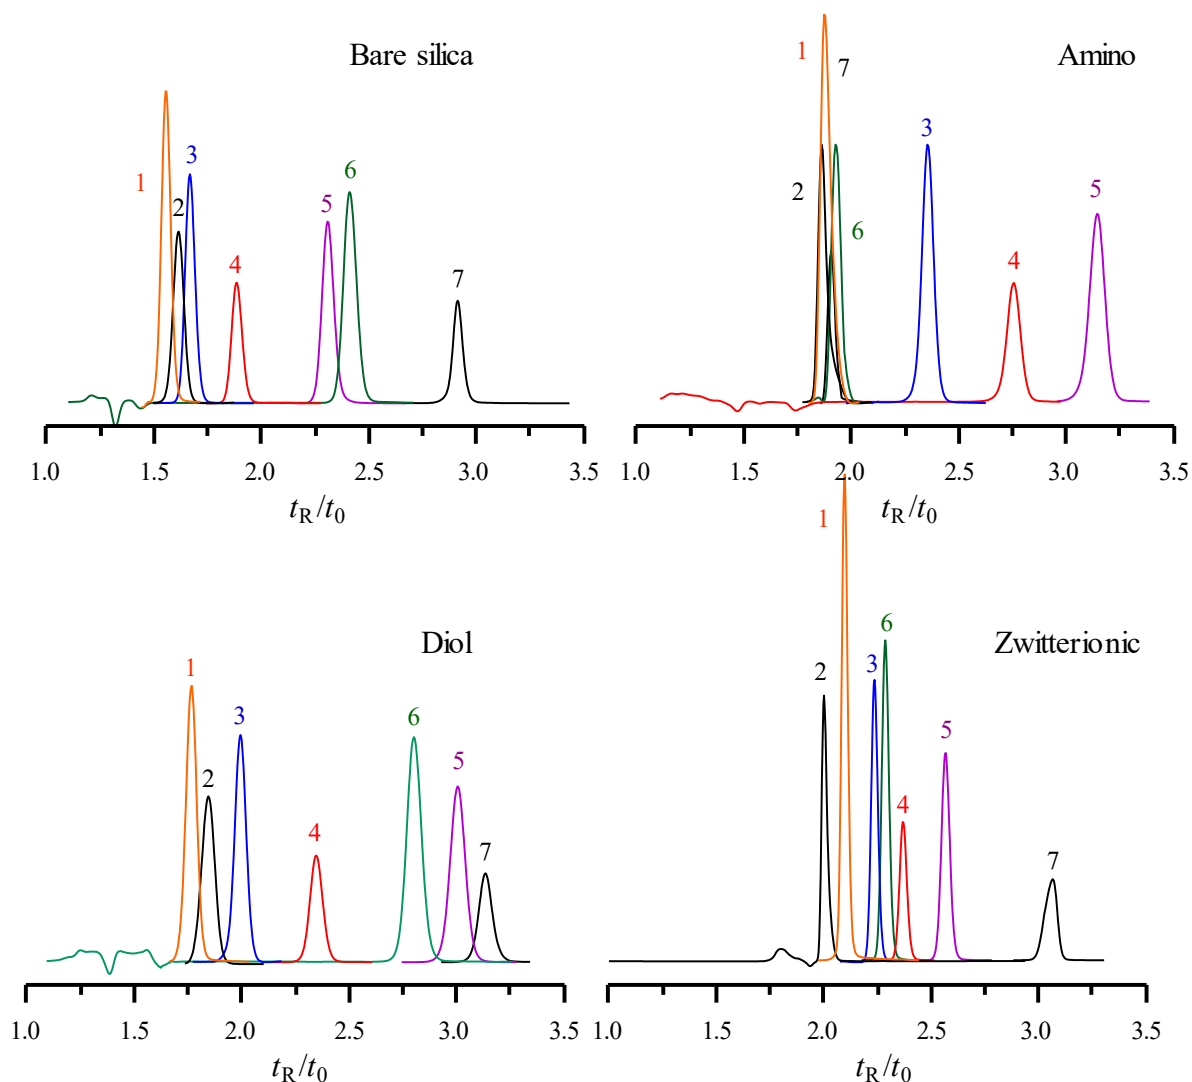

**Figure S1.** Chromatographic peaks obtained for uracil and six nucleosides eluted from HILIC columns, with a mobile phase containing 10 % water for bare silica, 11 % water for diol, 20 % water for amino, and 25 % water for the zwitterionic. The probe compounds (ordered according to their elution order with bare silica) are: (1) Uracil, (2) thymidine, (3) uridine, (4) xanthosine, (5) guanosine, (6) adenosine, and (7) cytidine.

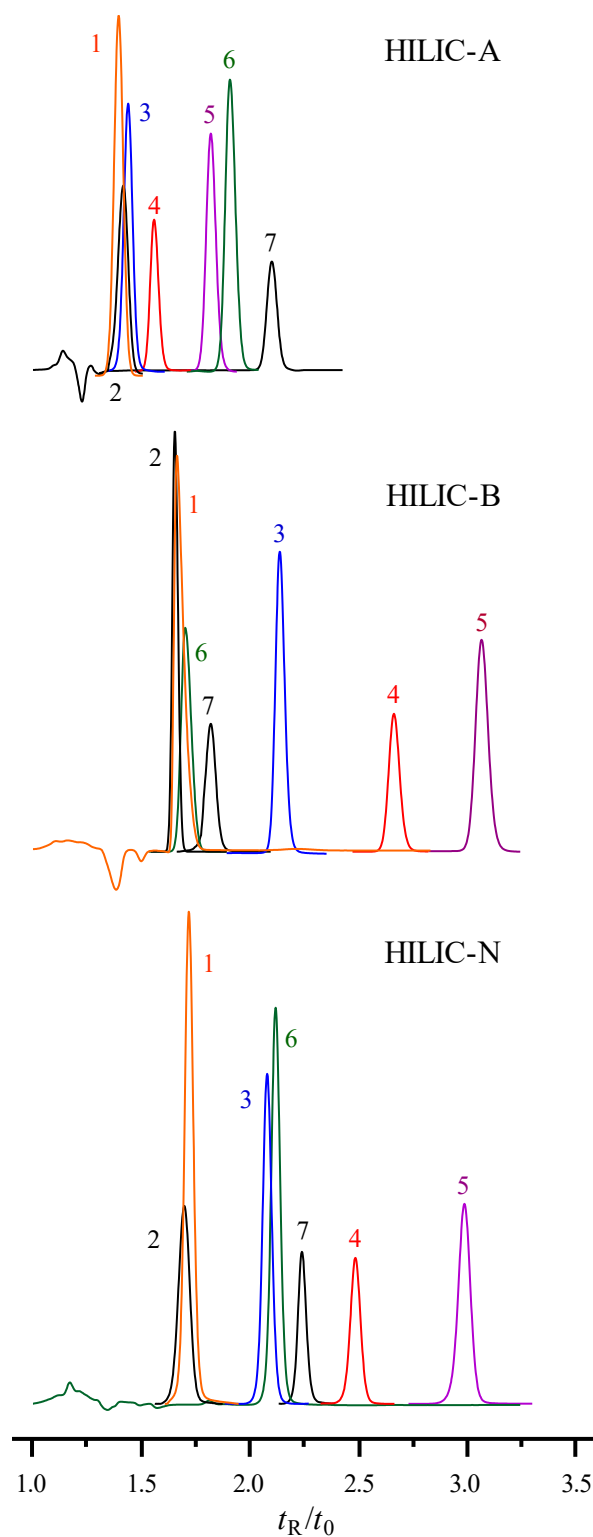

**Figure S2.** Chromatographic peaks obtained for uracil and six nucleosides eluted from HILIC columns, with a mobile phase containing 10 % water for HILIC A, and 20 % water for HILIC B and HILIC N. Other details are given in Figure S1.

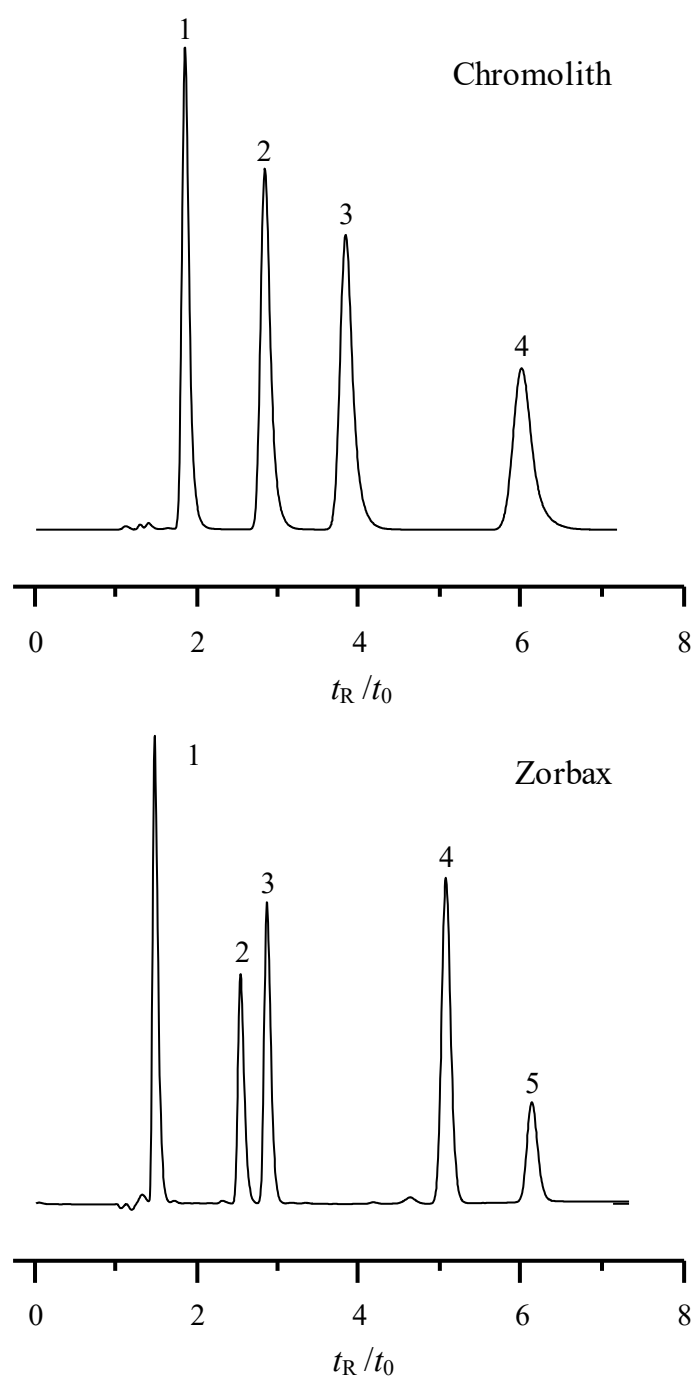

**Figure S3.** Chromatographic peaks obtained for sulphonamides and diuretics eluted from RPLC columns, with mobile phases containing 20% and 46% acetonitrile, respectively. Compound identities for Chromolith: (1) sulphamerazine, (2) sulphachloropyridazine, (3) sulphisoxazole, and (4) sulpha-quinoxaline. For Zorbax: (1) trichloromethiazide, (2) althiazide, (3) furosemide, (4) xipamide, and (5) ethacrynic acid.

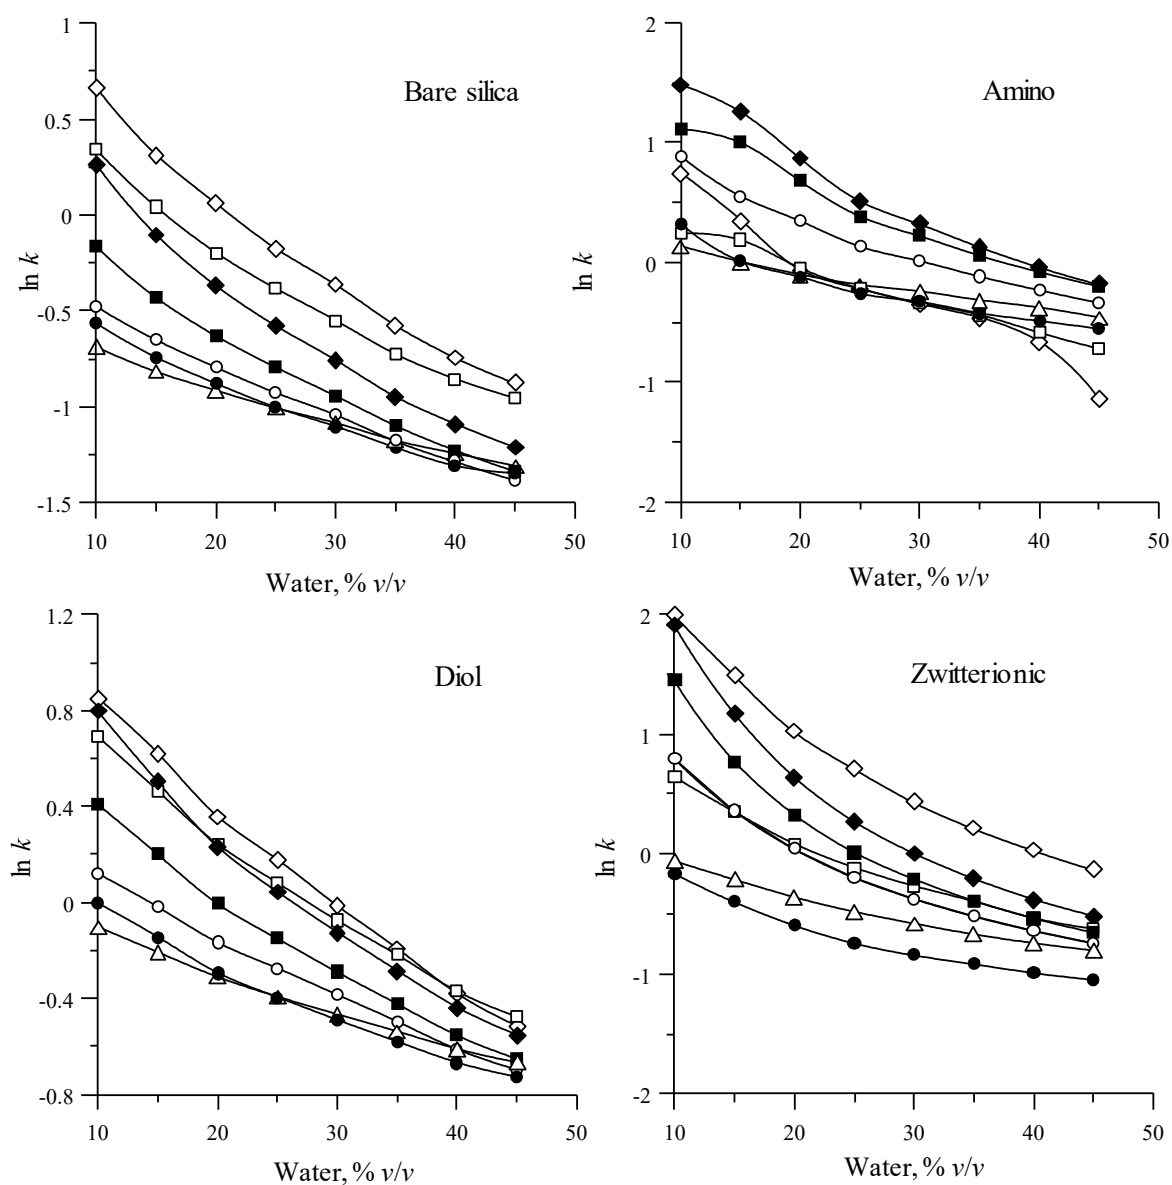

**Figure S4.** Retention behaviour for uracil and nucleosides, eluted with HILIC columns at increasing concentration of water. Compound identities (according to the elution order): Uracil (Δ), thymidine (●), uridine (○), xanthosine (■), guanosine (◆), adenosine (□), and cytidine (◇).

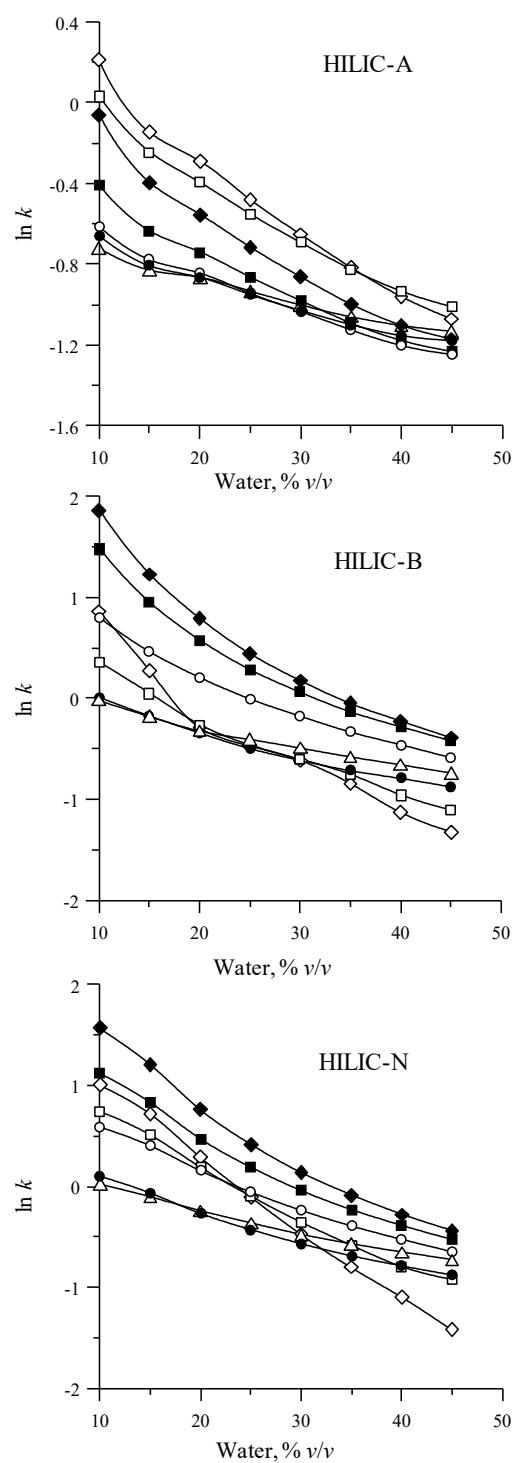

**Figure S5.** Retention behaviour for uracil and nucleosides, eluted with HILIC columns at increasing concentration of water. Compound identities are given in Fig. S4.

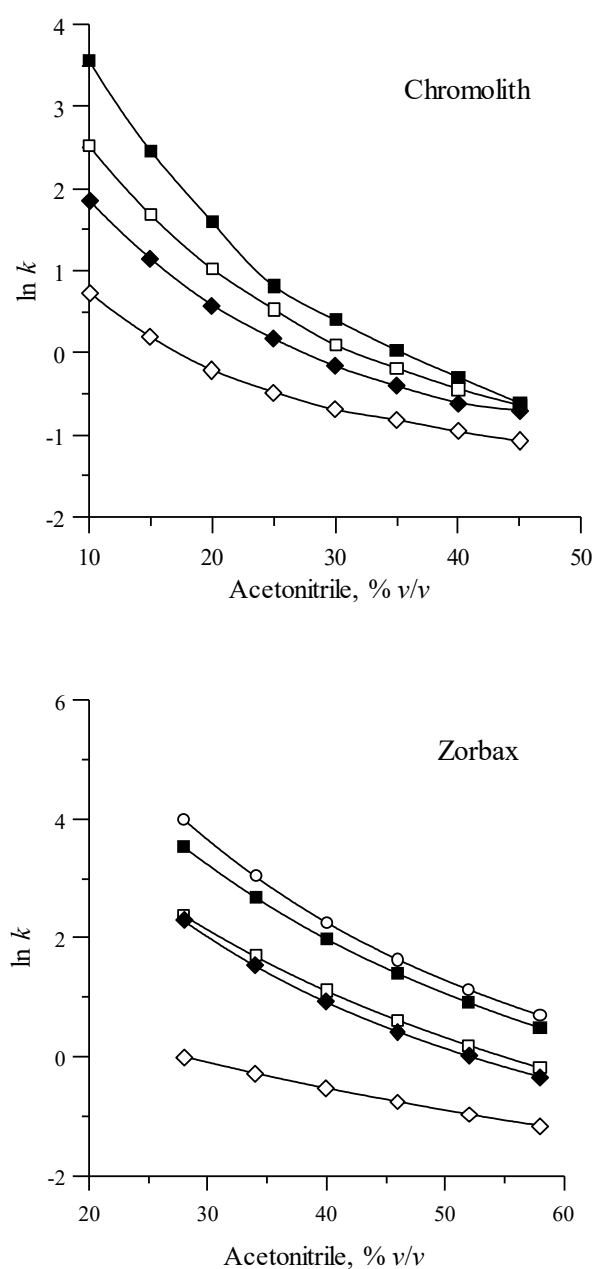

**Figure S6.** Retention behaviour for sulphonamides and diuretics, eluted with the RPLC columns at increasing concentration of acetonitrile. Compound identities for Chromolith: sulphamerazine ( $\diamond$ ), sulphachloropyridazine ( $\blacklozenge$ ), sulphisoxazole ( $\square$ ), and sulphaquinoxaline ( $\blacksquare$ ), and for Zorbax: trichloromethiazide ( $\diamond$ ), althiazide ( $\blacklozenge$ ), furosemide ( $\square$ ), xipamide ( $\blacksquare$ ), and ethacrynic acid ( $\circ$ ).

### Transformation of the original models to yield the modified equations

For Equation (S1) in main manuscript:

$$\ln k = \ln k_w - S\varphi = \ln k_w - S(\varphi_o + \Delta\varphi) = \ln k_w - S\varphi_o - S\Delta\varphi = \ln k_o - S\Delta\varphi \quad (\text{S1})$$

For Equation (S3):

$$\ln k = \ln k_w - a\varphi + b\varphi^2 = \ln k_w - a(\varphi_o + \Delta\varphi) + b(\varphi_o + \Delta\varphi)^2 \quad (\text{S1})$$

$$\ln k = \ln k_w - a(\varphi_o + \Delta\varphi) + b(\varphi_o^2 + \Delta\varphi^2 + 2\varphi_o\Delta\varphi)^2 \quad (\text{S2})$$

$$\ln k = \ln k_w - a\varphi_o + b\varphi_o^2 - a\Delta\varphi + 2b\varphi_o\Delta\varphi + b\Delta\varphi^2 \quad (\text{S3})$$

$$\ln k = \ln k_o - (a - 2b\varphi_o)\Delta\varphi + b\Delta\varphi^2 = \ln k_o - c\Delta\varphi + b\Delta\varphi^2 \quad (\text{S4})$$

For Equation (S4):

$$\ln k = \ln k_w - a \frac{\varphi_o + \Delta\varphi}{1 + b(\varphi_o + \Delta\varphi)} \quad (\text{S5})$$

$$\ln k = \ln k_w - a \frac{\varphi_o}{1 + b\varphi_o} + a \frac{\varphi_o}{1 + b\varphi_o} - a \frac{\varphi_o + \Delta\varphi}{1 + b\varphi_o + b\Delta\varphi} \quad (\text{S6})$$

$$\ln k = \ln k_o + a \frac{\varphi_o + b\varphi_o^2 + b\varphi_o\Delta\varphi - \varphi_o - \Delta\varphi - b\varphi_o^2 - b\varphi_o\Delta\varphi}{(1 + b\varphi_o)(1 + b\varphi_o + b\Delta\varphi)} \quad (\text{S7})$$

$$\ln k = \ln k_o - a \frac{\Delta\varphi}{(1 + b\varphi_o)(1 + b\varphi_o + b\Delta\varphi)} \quad (\text{S8})$$

$$\ln k = \ln k_o - \frac{a}{1 + b\varphi_o} \times \frac{\Delta\varphi}{1 + b\varphi_o + b\Delta\varphi} \quad (\text{S9})$$

$$\ln k = \ln k_o - \frac{\frac{a}{(1 + b\varphi_o)^2} \Delta\varphi}{1 + \frac{b}{1 + b\varphi_o} \Delta\varphi} = \ln k_o - c \frac{\Delta\varphi}{1 + d\Delta\varphi} \quad (\text{S10})$$

For Equation (S5):

$$k = \frac{(a\varphi_o)^{-m}}{(a\varphi_o)^{-m}} (a\varphi)^{-m} = e^{\ln k_o} \left( \frac{a\varphi}{a\varphi_o} \right)^{-m} = e^{\ln k_o} \left( \frac{\varphi}{\varphi_o} \right)^{-m} \quad (\text{S11})$$

where the following was considered:

$$k_o = e^{\ln k_o} = (a\varphi_o)^{-a} \quad (\text{S12})$$

For Equation (6):

$$k = (a + b(\varphi_o + \Delta\varphi))^{-m} = (a + b\varphi_o + b\Delta\varphi)^{-m} = (a_o + b\Delta\varphi)^{-m} \quad (\text{S13})$$

For Equation (S7):

$$k = \left( \frac{\varphi}{\varphi_0} \right)^{-m} \varphi_0^{-m} e^{a+b(\varphi_0+\Delta\varphi)} = \left( \frac{\varphi}{\varphi_0} \right)^{-m} e^{\ln k_0 + b\Delta\varphi} \quad (\text{S14})$$

where:

$$k_0 = \varphi_0^{-m} e^{a+b\varphi_0} \quad (\text{S15})$$

For Equation (S8):

$$\begin{aligned} k &= (1+b(\varphi_0+\Delta\varphi))^{-m} e^{a+c(\varphi_0+\Delta\varphi)} = (1+b\varphi_0+b\Delta\varphi)^{-m} e^{a+c(\varphi_0+\Delta\varphi)} = \\ &= \left( 1 + \frac{b}{1+b\varphi_0} \Delta\varphi \right)^{-m} (1+b\varphi_0)^{-m} e^{a+c(\varphi_0+\Delta\varphi)} \end{aligned} \quad (\text{S16})$$

Since:

$$k_0 = (1+b\varphi_0)^{-m} e^{a+c\varphi_0} \quad (\text{S17})$$

the following is obtained from Equation (S17):

$$k = (1+d\Delta\varphi)^{-m} e^{\ln k_0 + c\Delta\varphi} \quad (\text{S18})$$

**Table S2.** Correlation of the parameters in the LSS model for the assayed HILIC and RPLC columns. Parameters and determination coefficient for the lines in Figures 1 and 2 ( $S = n + m \ln k_0$ ) are given.

| Column       | <i>n</i> | <i>m</i> | <i>R</i> <sup>2</sup> |
|--------------|----------|----------|-----------------------|
| Silica       | 3.78     | 2.29     | 0.923                 |
| Diol         | 2.13     | 2.57     | 0.969                 |
| Amino        | 2.17     | 2.38     | 0.706                 |
| Zwitterionic | 2.98     | 3.49     | 0.883                 |
| HILIC-A      | 3.57     | 2.84     | 0.952                 |
| HILIC-B      | 3.06     | 3.39     | 0.787                 |
| HILIC-N      | 2.59     | 3.15     | 0.860                 |
| Chromolith   | 3.39     | 4.67     | 0.988                 |
| Zorbax       | 4.34     | 2.58     | 0.981                 |

**Table S3.** Correlation of  $S(\varphi)$  versus  $\ln k_1$  (lowest value in the considered experimental range), for the assayed HILIC and RPLC columns. Parameters and determination coefficient for the lines in Figures 3 and 4 ( $S = n + m \ln k_1$ ) are given.

| Column       | <i>n</i> | <i>m</i> | <i>R</i> <sup>2</sup> |
|--------------|----------|----------|-----------------------|
| Silica       | 3.34     | 2.76     | 0.809                 |
| Diol         | 5.31     | 2.90     | 0.846                 |
| Amino        | 3.42     | 1.97     | 0.202                 |
| Zwitterionic | 4.78     | 4.35     | 0.853                 |
| HILIC-A      | 5.59     | 3.97     | 0.735                 |
| HILIC-B      | 4.99     | 3.59     | 0.602                 |
| HILIC-N      | 3.86     | 1.66     | 0.432                 |
| Chromolith   | 6.78     | 4.90     | 0.968                 |
| Zorbax       | 6.87     | 3.24     | 0.962                 |

**Table S4.** Fitting of the experimental retention data to the elution degree model (Equation (24)), for uracil and nucleosides, obtained in HILIC with different columns and water in acetonitrile as modifier. Model parameters, fitting determination coefficients, and relative errors of prediction are given.

|                      | $\ln k_0$ | $S_g \times 10^2$ | $g$             | $R^2$   | $E_r$ (%)       |
|----------------------|-----------|-------------------|-----------------|---------|-----------------|
| Underivatized silica |           |                   |                 |         |                 |
| Uracil               | -0.69     | 5.69              | 2.15            | 0.9994  | 0.10            |
| Cytidine             | 0.66      | 4.87              | 1.65            | 0.9996  | 0.46            |
| Guanosine            | 0.26      | 6.69              | 1.86            | 0.9997  | 0.28            |
| Adenosine            | 0.34      | 5.07              | 1.83            | 0.9998  | 0.24            |
| Xanthosine           | -0.16     | 6.56              | 1.86            | 0.9995  | 0.24            |
| Uridine              | -0.47     | 4.63              | 1.62            | 0.9996  | 0.14            |
| Thymidine            | -0.56     | 7.71              | 2.22            | 0.9991  | 0.18            |
| Mean                 |           |                   | $1.88 \pm 0.23$ |         | $0.23 \pm 0.12$ |
| Diol                 |           |                   |                 |         |                 |
| Uracil               | -0.105    | 2.62              | 2.22            | 0.9998  | 0.10            |
| Cytidine             | 0.85      | 3.74              | 1.39            | 0.9992  | 0.56            |
| Guanosine            | 0.80      | 3.69              | 1.79            | 0.9997  | 0.34            |
| Adenosine            | 0.69      | 3.19              | 1.67            | 0.9996  | 0.32            |
| Xanthosine           | 0.41      | 3.43              | 1.78            | 0.9996  | 0.27            |
| Uridine              | 0.12      | 2.78              | 1.57            | 0.9994  | 0.22            |
| Thymidine            | -0.003    | 3.38              | 2.21            | 0.9993  | 0.21            |
| Mean                 |           |                   | $1.80 \pm 0.30$ |         | $0.29 \pm 0.14$ |
| Amino                |           |                   |                 |         |                 |
| Uracil               | 0.13      | 2.23              | 2.72            | 0.9977  | 0.37            |
| Cytidine             | 0.74      | 5.25              | 1.90            | 0.988   | 2.47            |
| Guanosine            | 1.53      | 4.14              | 1.37            | 0.9964  | 2.03            |
| Adenosine            | 0.28      | 2.99              | 1.18            | 0.987   | 1.30            |
| Xanthosine           | 1.39      | 3.19              | 1.75            | 0.9984  | 1.09            |
| Uridine              | 0.88      | 2.66              | 2.24            | 0.9995  | 0.44            |
| Thymidine            | 0.32      | 3.88              | 3.53            | 0.9981  | 0.47            |
| Mean                 |           |                   | $2.10 \pm 0.80$ |         | $1.2 \pm 0.8$   |
| HILIC-N              |           |                   |                 |         |                 |
| Uracil               | 0.03      | 2.97              | 1.80            | 0.9990  | 0.28            |
| Cytidine             | 1.03      | 7.31              | 0.98            | 0.9982  | 1.44            |
| Guanosine            | 1.58      | 5.29              | 1.33            | 0.9966  | 2.33            |
| Adenosine            | 0.76      | 5.20              | 1.14            | 0.9968  | 1.33            |
| Xanthosine           | 1.13      | 4.54              | 1.42            | 0.9968  | 1.66            |
| Uridine              | 0.60      | 3.76              | 1.40            | 0.9972  | 0.94            |
| Thymidine            | 0.11      | 3.91              | 1.72            | 0.9979  | 0.52            |
| Mean                 |           |                   | $1.30 \pm 0.60$ |         | $1.2 \pm 0.7$   |
| HILIC-A              |           |                   |                 |         |                 |
| Uracil               | -0.73     | 6.90              | 2.86            | 0.9925  | 0.28            |
| Cytidine             | 0.21      | 5.68              | 1.96            | 0.996   | 0.94            |
| Guanosine            | -0.065    | 8.30              | 2.42            | 0.9972  | 0.57            |
| Adenosine            | 0.026     | 5.55              | 2.17            | 0.9981  | 0.47            |
| Xanthosine           | -0.42     | 7.94              | 2.42            | 0.9961  | 0.42            |
| Uridine              | -0.62     | 6.30              | 2.31            | 0.9945  | 0.36            |
| Thymidine            | -0.66     | 11.84             | 3.17            | 0.9941  | 0.32            |
| Mean                 |           |                   | $2.50 \pm 0.40$ |         | $0.48 \pm 0.22$ |
| HILIC-B              |           |                   |                 |         |                 |
| Uracil               | -0.020    | 3.65              | 2.49            | 0.9984  | 0.29            |
| Cytidine             | 0.86      | 8.00              | 1.78            | 0.9984  | 1.11            |
| Guanosine            | 1.86      | 4.33              | 1.71            | 0.99996 | 0.30            |
| Adenosine            | 0.36      | 5.68              | 1.77            | 0.9981  | 0.80            |

|              |        |      |             |         |           |
|--------------|--------|------|-------------|---------|-----------|
| Xanthosine   | 1.48   | 3.91 | 1.83        | 0.99995 | 0.28      |
| Uridine      | 0.80   | 3.82 | 1.91        | 0.99998 | 0.10      |
| Thymidine    | 0.013  | 4.43 | 2.12        | 0.9992  | 0.32      |
| Mean         |        |      | 1.90 ± 0.30 |         | 0.5 ± 0.4 |
| Zwitterionic |        |      |             |         |           |
| Uracil       | -0.055 | 4.04 | 2.31        | 0.9995  | 0.19      |
| Cytidine     | 2.00   | 4.01 | 1.56        | 0.9991  | 1.35      |
| Guanosine    | 1.91   | 5.14 | 1.71        | 0.9996  | 1.08      |
| Adenosine    | 0.64   | 3.88 | 1.95        | 0.9994  | 0.46      |
| Xanthosine   | 1.45   | 5.12 | 1.91        | 0.9998  | 0.62      |
| Uridine      | 0.80   | 4.93 | 2.06        | 0.9998  | 0.36      |
| Thymidine    | -0.16  | 8.61 | 2.80        | 0.9985  | 0.35      |
| Mean         |        |      | 2.00 ± 0.40 |         | 0.6 ± 0.4 |
| Global mean  |        |      | 1.90 ± 0.60 |         | 0.7 ± 0.6 |

**Table S5.** Fitting of the experimental retention data to the elution degree model (Equation (24)), for sulphonamides and diuretics, obtained in RPLC with the Chromolith and Zorbax columns and acetonitrile in water as modifier. Model parameters, fitting determination coefficients and prediction relative errors are given.

|                        | $\ln k_o$ | $S_g \times 10^2$ | $g$         | $R^2$   | $E_r$ (%)   |
|------------------------|-----------|-------------------|-------------|---------|-------------|
| Chromolith             |           |                   |             |         |             |
| Sulphamerazine         | 0.73      | 7.30              | 1.98        | 0.9993  | 0.77        |
| Sulphachloropyridazine | 1.86      | 6.52              | 1.55        | 0.9995  | 1.21        |
| Sulphisoxazole         | 2.52      | 7.13              | 1.42        | 0.9998  | 1.03        |
| Sulphaquinolone        | 3.56      | 9.47              | 1.28        | 0.9998  | 1.49        |
| Mean                   |           |                   | 1.60 ± 0.30 |         | 1.1 ± 0.3   |
| Zorbax                 |           |                   |             |         |             |
| Trichloromethiazide    | -0.0091   | 4.91              | 1.40        | 0.99999 | 0.041       |
| Althiazide             | 2.30      | 6.58              | 1.35        | 0.99998 | 0.25        |
| Furosemide             | 2.39      | 6.49              | 1.28        | 0.99999 | 0.17        |
| Xipamide               | 3.55      | 6.22              | 1.27        | 0.99999 | 0.28        |
| Ethacrynic acid        | 4.00      | 6.20              | 1.27        | 0.99998 | 0.42        |
| Mean                   |           |                   | 1.32 ± 0.06 |         | 0.19 ± 0.11 |
| Global mean            |           |                   | 1.40 ± 0.20 |         | 0.7 ± 0.5   |
